# Supplementary material for: Diagnosing Acute Cellular Rejection after Paediatric Liver Transplantation—Is There Room for Interleukin Profiles?
Source: MDPI journal article supplement (doi:10.3390/children10010128), 2023-01-07
Supplement: s1 [file s1]

Supplementary Figure S1: Number of biopsy per time interval after Plt.

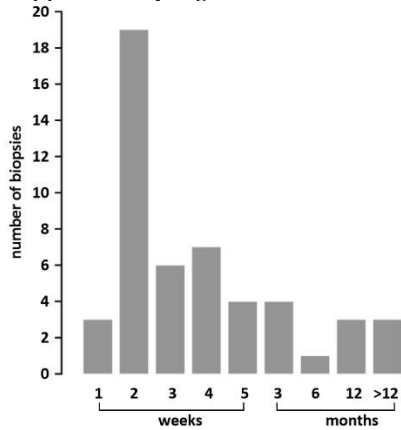

Supplementary Table S1: soluble cytokine levels in rejectors and non-rejectors.

| cytokines                |                 | synonym | rejection      | no rejection   | T (df)     | p           | Effect size<br>(Cohen's d) |
|--------------------------|-----------------|---------|----------------|----------------|------------|-------------|----------------------------|
|                          |                 |         | mean $\pm$ SD  | mean $\pm$ SD  |            |             |                            |
| TH1 responses            | IFN- $\gamma$   |         | 2.4 $\pm$ 2.0  | 2.1 $\pm$ 1.7  | 0.6 (50)   | 0.56        |                            |
|                          | IL-2            |         | 1.5 $\pm$ 1.5  | 1.4 $\pm$ 1.2  | 0.2 (50)   | 0.80        |                            |
|                          | IL-12(p70)      |         | 1.8 $\pm$ 1.6  | 1.5 $\pm$ 1.0  | 0.6 (50)   | 0.52        |                            |
|                          | G-CSF           |         | 4.3 $\pm$ 0.7  | 4.2 $\pm$ 0.5  | 0.8 (50)   | 0.40        |                            |
|                          | GM-CSF          |         | 1.4 $\pm$ 1.2  | 1.4 $\pm$ 1.1  | 0.1 (50)   | 0.96        |                            |
|                          | TNF- $\alpha$   |         | 2.9 $\pm$ 0.8  | 2.7 $\pm$ 0.6  | 1.0 (50)   | 0.30        |                            |
| TH2 responses            | IL-4            |         | 0.6 $\pm$ 0.6  | 0.6 $\pm$ 0.5  | 0.5 (50)   | 0.60        |                            |
|                          | IL-5            |         | 2.4 $\pm$ 1.0  | 2.8 $\pm$ 0.6  | -1.4 (50)  | 0.16        |                            |
|                          | IL-10           |         | 2.2 $\pm$ 1.1  | 1.7 $\pm$ 1.1  | 1.6 (50)   | 0.13        |                            |
|                          | IL-13           |         | 0.8 $\pm$ 1.2  | 0.8 $\pm$ 1.3  | 0.1 (50)   | 0.9         |                            |
| TH9 responses            | IL-9            |         | 3.6 $\pm$ 0.6  | 3.4 $\pm$ 0.3  | 1.1 (50)   | 0.27        |                            |
| TH17 responses           | IL-17           |         | 2.2 $\pm$ 1.5  | 1.6 $\pm$ 1.4  | 1.3 (50)   | 0.21        |                            |
|                          | IL12p40         | IL-23   | 5.5 $\pm$ 1.1  | 5.1 $\pm$ 1.1  | 1.4 (51)   | 0.18        |                            |
| polyfunctional           | IL-1 $\alpha$   |         | -0.7 $\pm$ 1.5 | -1.0 $\pm$ 1.7 | 0.6 (48)   | 0.57        |                            |
|                          | IL-1 $\beta$    |         | 0.8 $\pm$ 0.9  | 0.5 $\pm$ 0.8  | 1.3 (50)   | 0.20        |                            |
|                          | IL-1RA          |         | 5.2 $\pm$ 0.9  | 5.1 $\pm$ 0.8  | 0.3 (50)   | 0.79        |                            |
|                          | IL-3            |         | 5.9 $\pm$ 0.7  | 5.5 $\pm$ 0.8  | 1.7 (51)   | 0.09        | 0.8                        |
|                          | IL-6            |         | 2.5 $\pm$ 1.1  | 2.0 $\pm$ 1.0  | 1.8 (50)   | 0.08        | 1.1                        |
|                          | IL-7            |         | 1.1 $\pm$ 1.2  | 1.5 $\pm$ 0.7  | -1.5 (50)  | 0.15        |                            |
|                          | IL15            |         | 1.5 $\pm$ 1.5  | 1.8 $\pm$ 1.6  | -0.7 (50)  | 0.49        |                            |
|                          | IL-16           |         | 6.3 $\pm$ 0.8  | 5.9 $\pm$ 0.7  | 2.1 (51)   | <b>0.04</b> | 1.1                        |
|                          | IL-18           |         | 5.0 $\pm$ 1.1  | 4.2 $\pm$ 1.2  | 2.6 (51)   | <b>0.01</b> | 1.1                        |
|                          | IFN- $\alpha$ 2 |         | 4.1 $\pm$ 0.5  | 3.9 $\pm$ 0.4  | 1.6 (51)   | <b>0.11</b> |                            |
|                          | LIF             |         | 3.7 $\pm$ 0.6  | 3.6 $\pm$ 0.6  | 0.6 (51)   | 0.53        |                            |
| <i>angiogenic factor</i> | VEGF            |         | 3.4 $\pm$ 1.1  | 2.8 $\pm$ 0.9  | 1.6 (50)   | 0.11        |                            |
| <i>chemokines</i>        |                 |         |                |                |            |             |                            |
| chemokines               | CCL2            | MCP-1   | 2.7 $\pm$ 1.2  | 2.5 $\pm$ 0.8  | 0.4 (50)   | 0.68        |                            |
|                          | CCL3            | MIP-1   | 1.1 $\pm$ 1.1  | 0.7 $\pm$ 0.8  | 1.3 (50)   | 0.20        |                            |
|                          | CCL4            | MIP-1   | 4.1 $\pm$ 0.6  | 3.8 $\pm$ 0.4  | 2.2 (50)   | 0.03        | 0.5                        |
|                          | CCL5            | RANTES  | 7.5 $\pm$ 0.8  | 7.5 $\pm$ 0.7  | -0.1 (50)  | 0.99        |                            |
|                          | CCL7            | MCP-3   | 4.5 $\pm$ 0.7  | 4.3 $\pm$ 1.2  | 0.7 (20.2) | 0.52        |                            |
|                          | CCL11           | Eotaxin | 3.7 $\pm$ 0.7  | 3.4 $\pm$ 0.6  | 1.8 (50)   | 0.07        | 0.7                        |
|                          | CCL27           | CTACK   | 5.8 $\pm$ 0.9  | 6.0 $\pm$ 0.5  | -1.0 (49)  | 0.33        |                            |
| CXCL chemokines          | CXCL1           | Gro-a   | 4.4 $\pm$ 0.7  | 4.4 $\pm$ 0.5  | 0.4 (51)   | 0.68        |                            |
|                          | CXCL8           | IL-8    | 3.1 $\pm$ 1.4  | 2.2 $\pm$ 0.8  | 2.4 (50)   | 0.02        | 1.2                        |

|                                  |               |                |          |          |             |             |      |
|----------------------------------|---------------|----------------|----------|----------|-------------|-------------|------|
|                                  | CXCL9         | MIG            | 7.0±1.0  | 6.0±1.7  | 2.4 (22)    | 0.02        | 1.3  |
|                                  | CXCL10        | IP-10          | 6.4±1.2  | 5.6±1.1  | 2.2 (50)    | 0.04        | 1.2  |
|                                  | CXCL12        | SDF-1 $\alpha$ | 5.9±0.6  | 5.8±1.7  | 0.2 (18)    | 0.82        |      |
| <b>growth factors</b>            | M-CSF         |                | 3.0±1.0  | 2.6±2.1  | 0.7 (19.8)  | 0.50        |      |
|                                  | SCF           |                | 4.5±0.8  | 4.7±2.0  | -0.3 (18)   | 0.74        |      |
|                                  | SCGF- $\beta$ |                | 10.0±0.7 | 9.4±1.0  | 2.5 (51)    | 0.01        | 0.84 |
|                                  | PDGF          |                | 5.4±1.5  | 5.3±1.3  | 0.2 (50)    | 0.86        |      |
|                                  | HGF           |                | 6.4±1.3  | 5.6±1.1  | 2.2 (51)    | 0.04        | 0.52 |
|                                  | FGF $\beta$   |                | 2.7±0.7  | 2.6±0.7  | 0.5 (50)    | 0.60        |      |
|                                  | MIF           |                | 8.2±1.2  | 7.4±1.0  | 2.4 (51)    | 0.02        | 1.1  |
|                                  | TNF- $\beta$  | LT $\alpha$    | 1.9±0.9  | 1.8±1.6  | 0.4 (51)    | 0.69        |      |
| <b>soluble surface molecules</b> | sCD25         | IL-2R $\alpha$ | 6.3±1.4  | 5.5±1.5  | 1.7 (51)    | 0.09        | 1.4  |
|                                  | ICAM-1        |                | 10.9±0.5 | 9.8±2.3  | 1.9 (16.8)  | <b>0.07</b> | 1.4  |
|                                  | VCAM          |                | 10.2±0.8 | 10.0±0.7 | 1.3 (51)    | 0.19        |      |
|                                  | TRAIL         |                | 4.7±0.9  | 4.9±2.2  | -0.5 (18.5) | 0.63        |      |

Supplementary Table S2: Differences in cytokine levels between rejectors and non-rejectors based on timing of rejection.

| < 20 days<br>rejection n=19<br>no rejection n=6  | rejection                 | no rejection              | T (df)     | P     | Effect size |
|--------------------------------------------------|---------------------------|---------------------------|------------|-------|-------------|
|                                                  | Ln (conc) [pg/ml] mean±SD | Ln (conc) [pg/ml] mean±SD |            |       | Cohen's d   |
| IL-1b                                            | 1.1±0.7                   | 0.3±0.7                   | 2.5 (23)   | 0.02  | 0.7         |
| IL-4                                             | 0.7±0.3                   | 0.4±0.3                   | 2,3 (23)   | 0.01  | 0.3         |
| CXCL8                                            | 3.6±1.5                   | 2.5±0.5                   | 2.6 (22.9) | 0.02  | 1.4         |
| CCL11                                            | 4.0±0.6                   | 3.2±0.5                   | 2.9 (23)   | 0.01  | 0.6         |
| IL-18                                            | 5.2±1.2                   | 3.9±0.9                   | 2.5 (24)   | 0.02  | 1.1         |
| HGF                                              | 6.5±1.4                   | 5.3±0.6                   | 2.1 (24)   | 0.046 | 1.3         |
| M-CSF                                            | 3.0±1.1                   | 1.6±0.9                   | 2.8 (24)   | 0.01  | 1.1         |
| CXCL12                                           | 5.8±0.7                   | 6.8±0.8                   | -2.9 (24)  | 0.01  | 0.7         |
| TNF $\beta$                                      | 2.1±0.8                   | 1.2±1.0                   | 2.2 (24)   | 0.04  | 0.9         |
| ≥ 20 days<br>rejection n=16<br>no rejection n=11 | rejection                 | no rejection              | T (df)     | P     | Effect size |
|                                                  | Ln (conc) [pg/ml] mean±SD | Ln (conc) [pg/ml] mean±SD |            |       | Cohen's d   |
| CCL3                                             | 1.3±0.7                   | 0.7±0.6                   | 2.2 (25)   | 0.04  | 0.6         |
| CCL4                                             | 4.1±0.4                   | 3.7±0.4                   | 2.1 (25)   | 0.04  | 0.4         |
| INF $\alpha$ 2                                   | 4.1±0.5                   | 3.7±0.34                  | 2.2 (25)   | 0.04  | 0.4         |
